# Supplementary material for: Inhalable Formulation Based on Lipid–Polymer Hybrid Nanoparticles for the Macrophage Targeted Delivery of Roflumilast
Source: PubMed Central journal article supplement (PMC9364311; doi:10.1021/acs.biomac.2c00576), 2022-07-28
Supplement: bm2c00576_si_001.pdf [file bm2c00576_si_001.pdf]

## *Supporting Information*

# **Inhalable formulation based on lipid-polymer hybrid nanoparticles for the macrophage targeted delivery of Roflumilast**

*Emanuela F. Craparo<sup>1,2</sup>, Marta Cabibbo<sup>1</sup>, Cinzia Scialabba<sup>1</sup>, Gaetano Giammona<sup>1,2</sup>, Gennara Cavallaro<sup>1,2,3\*</sup>*

<sup>1</sup>Lab of Biocompatible Polymers, Department of Biological, Chemical and Pharmaceutical Sciences and Technologies (STEBICEF), University of Palermo, Via Archirafi 32, Palermo, 90123, Italy

<sup>2</sup>Consorzio Interuniversitario Nazionale per la Scienza e Tecnologia dei Materiali (INSTM) of Palermo.

<sup>3</sup>Advanced Technology and Network Center (ATeN Center), Università di Palermo, Palermo 90133, Italy;

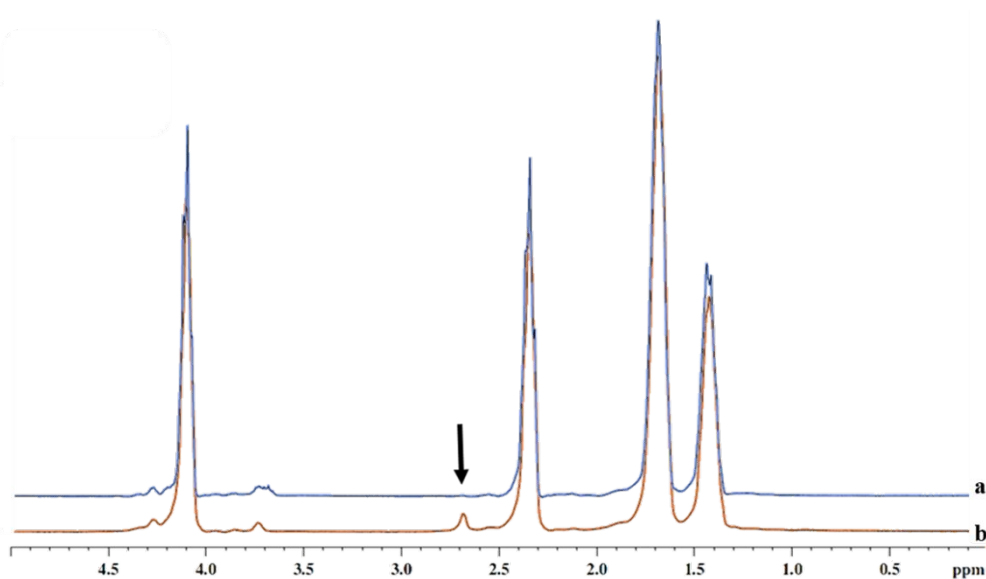

**Figure S1.** <sup>1</sup>H NMR spectra of PCL and PCL-Succ in CDCl<sub>3</sub>.

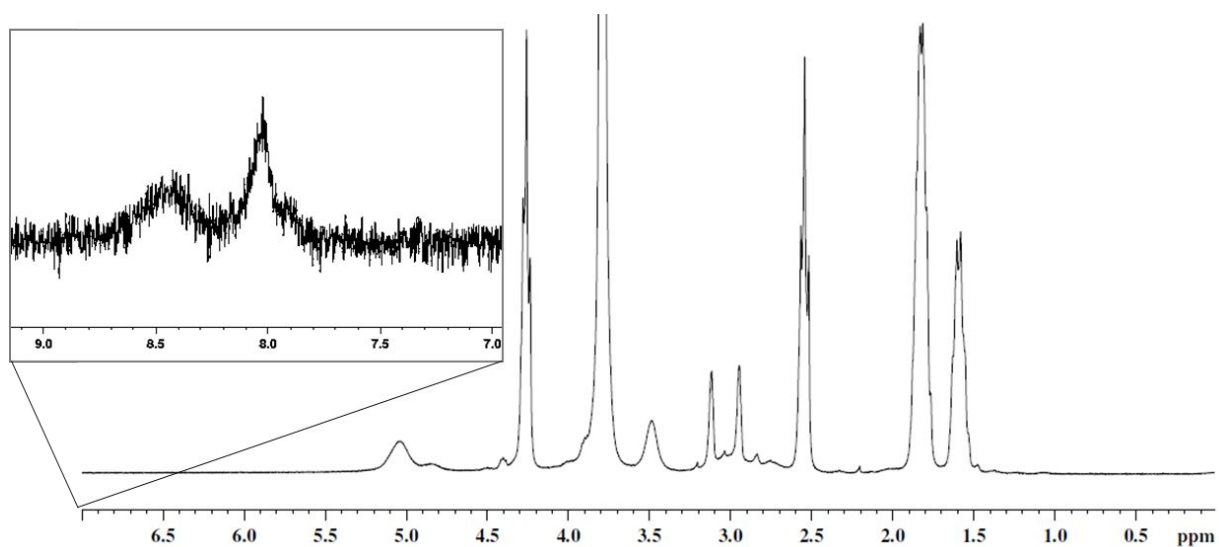

**Figure S2.** <sup>1</sup>H-NMR spectrum of PHEA-g-RhB-g-SUCC-PCL copolymers in DMF-d<sub>7</sub>.

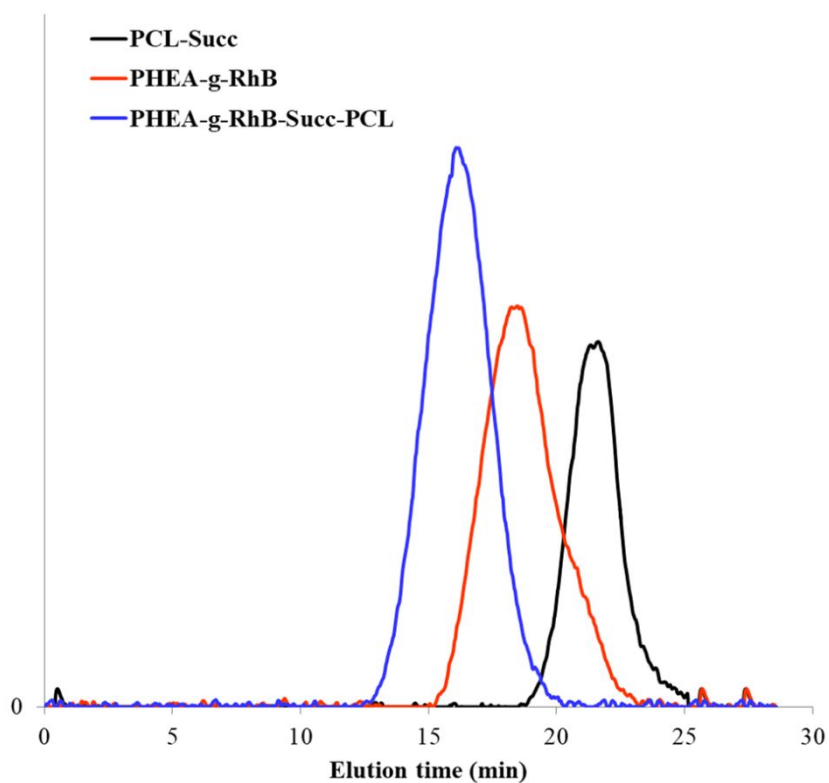

**Figure S3.** Size Exclusion Chromatography (SEC) chromatograms for PCL-Succ (black line), PHEA-RhB (red line) and PHEA-g-RhB-g-Succ-PCL graft copolymer (blue line) in DMF + LiBr 0.01M.

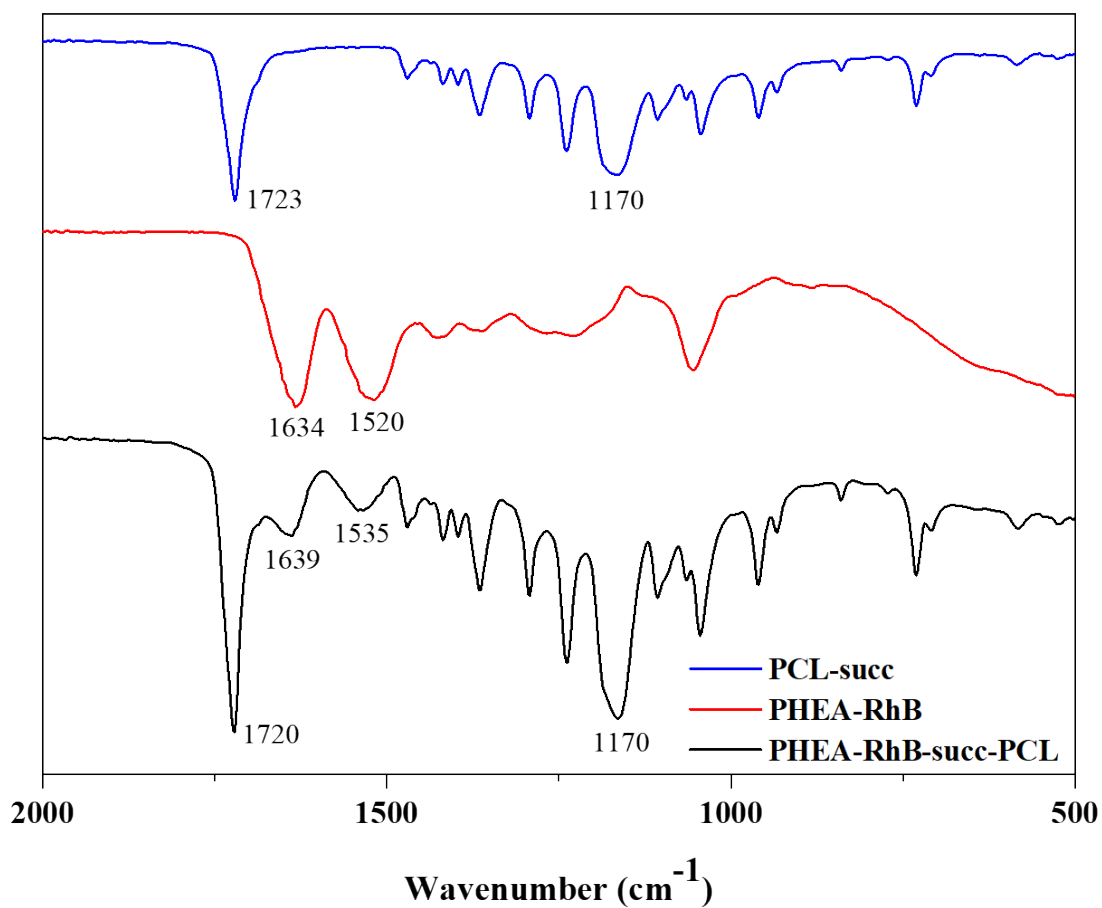

**Figure S4.** FT-IR spectra of PCL-Succ (blue line), PHEA-g-RhB (red line), and PHEA-g-RhB-g-Succ-PCL graft copolymer (black line). Each freeze-dried copolymer was analysed and spectra were registered by a Bruker ALPHA FT-IR spectrometer (Bruker, Milan, Italy).

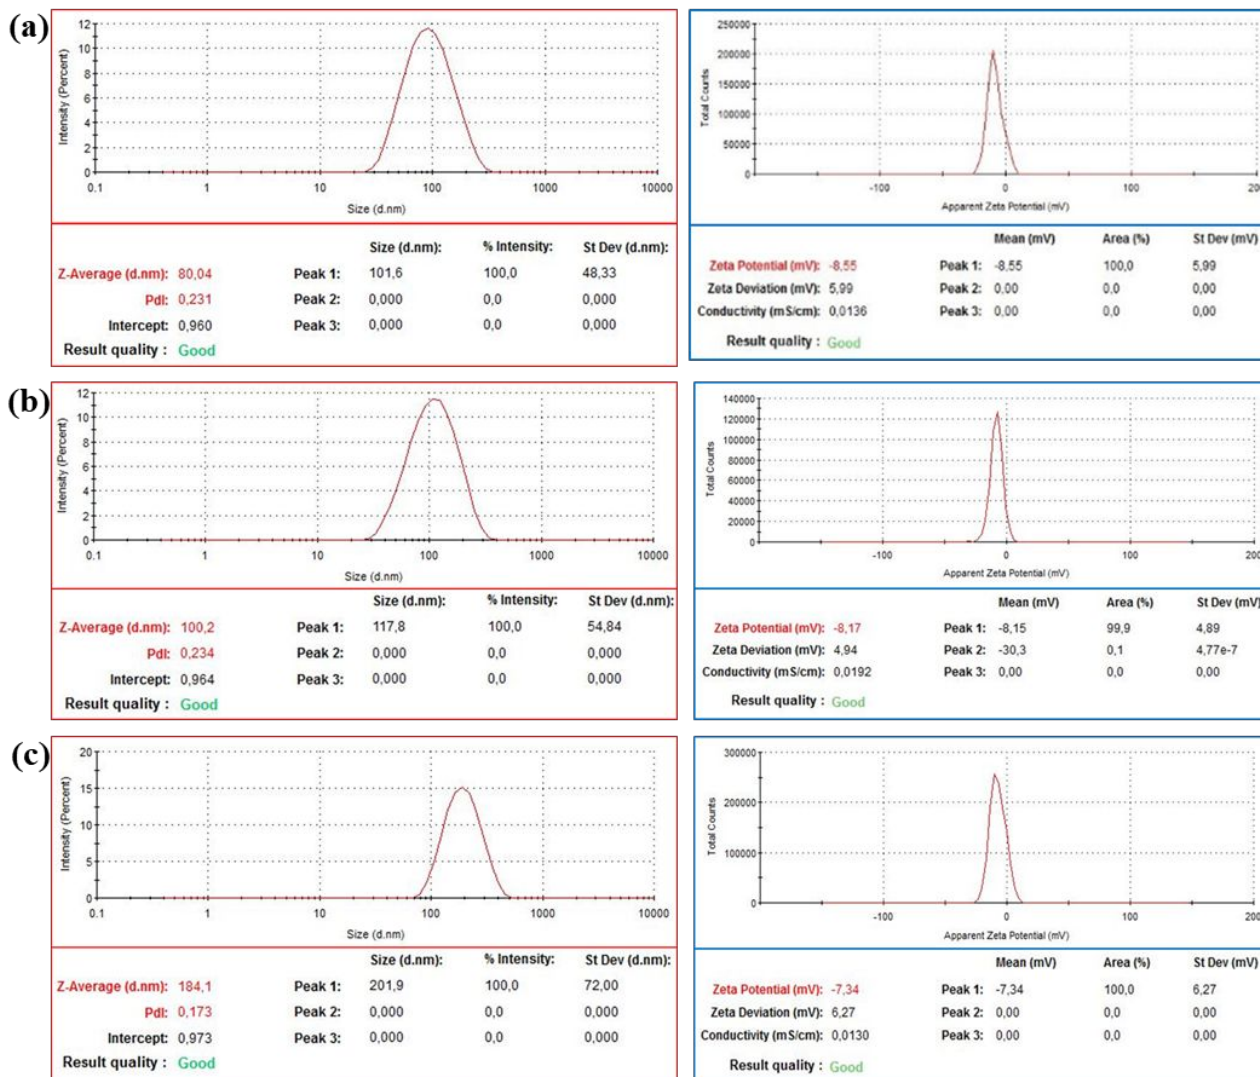

**Figure S5.** Distribution curves of mean size (intensity %) (left) and zeta potential (right) of sample LPHFNPs before freeze-drying (a), and after freeze-drying and redispersion in bidistilled water (b) or in a 10 mM NaCl aqueous solution (c). Both analyses were obtained by using a Malvern Zetasizer NanoZS (Malvern Instruments).

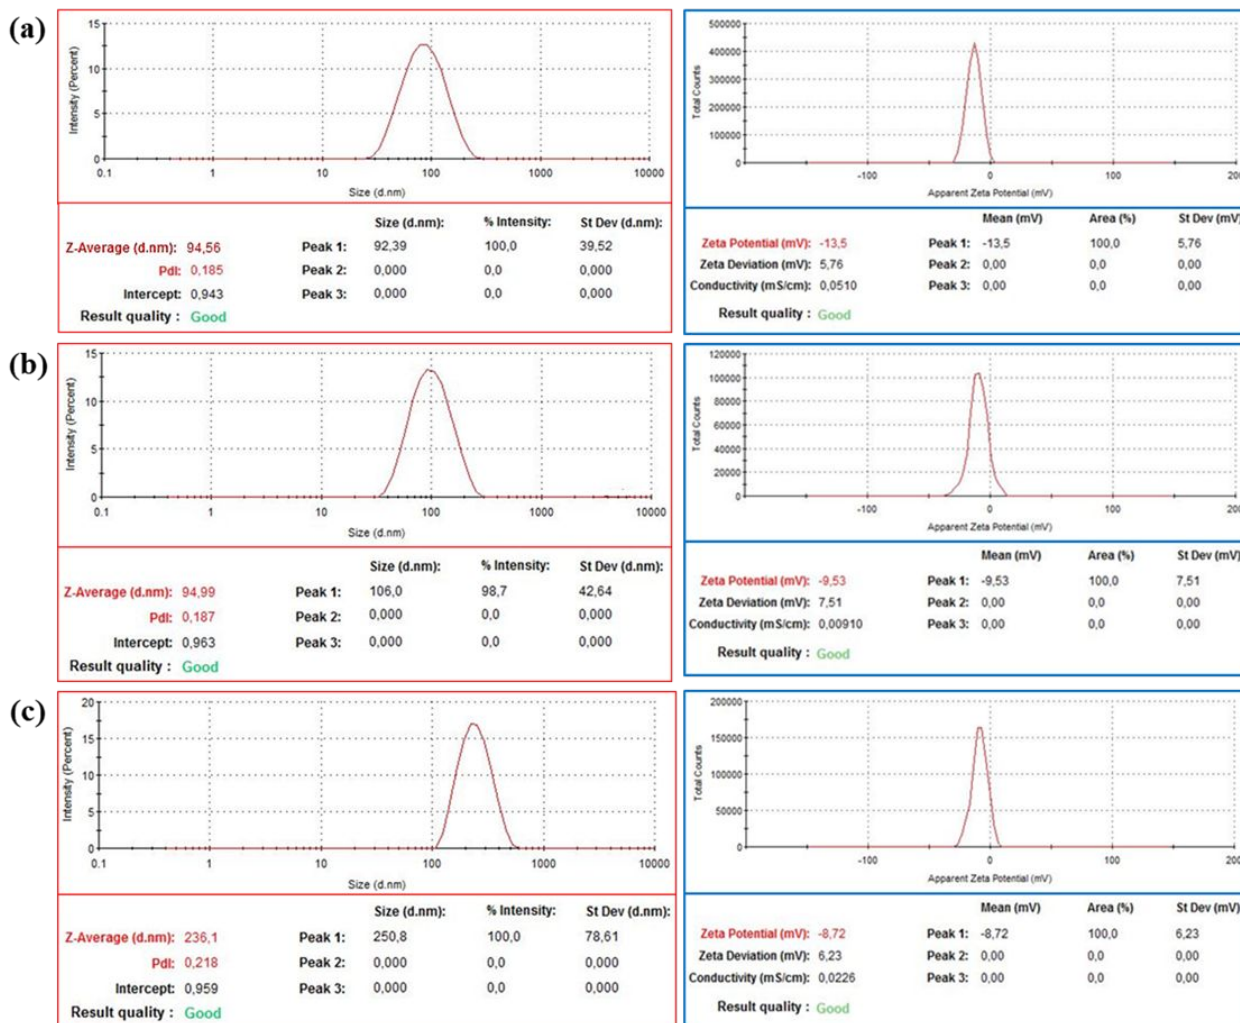

**Figure S6.** Distribution curves of mean size (intensity %) and zeta potential of sample LPHFNPs@Roflumilast before freeze-drying (a), and after freeze-drying and redispersion in bidistilled water (b) or in a 10 mM NaCl aqueous solution (c).

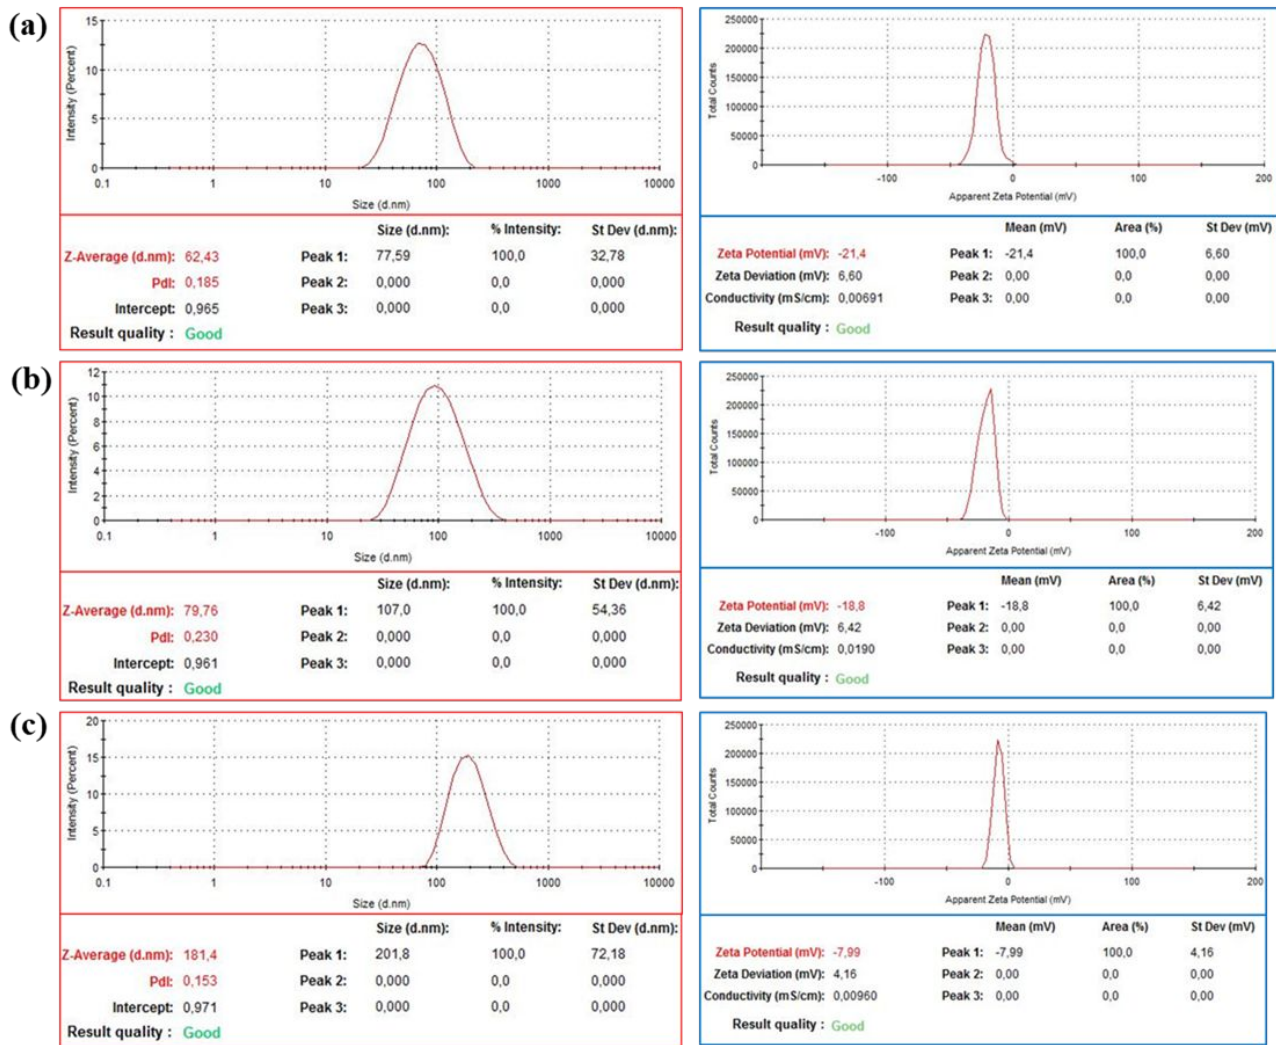

**Figure S7.** Distribution curves of mean size (intensity %) and zeta potential of sample Man-LPHFNPs before freeze-drying (a), and after freeze-drying and redispersion in bidistilled water (b) or in a 10 mM NaCl aqueous solution (c).



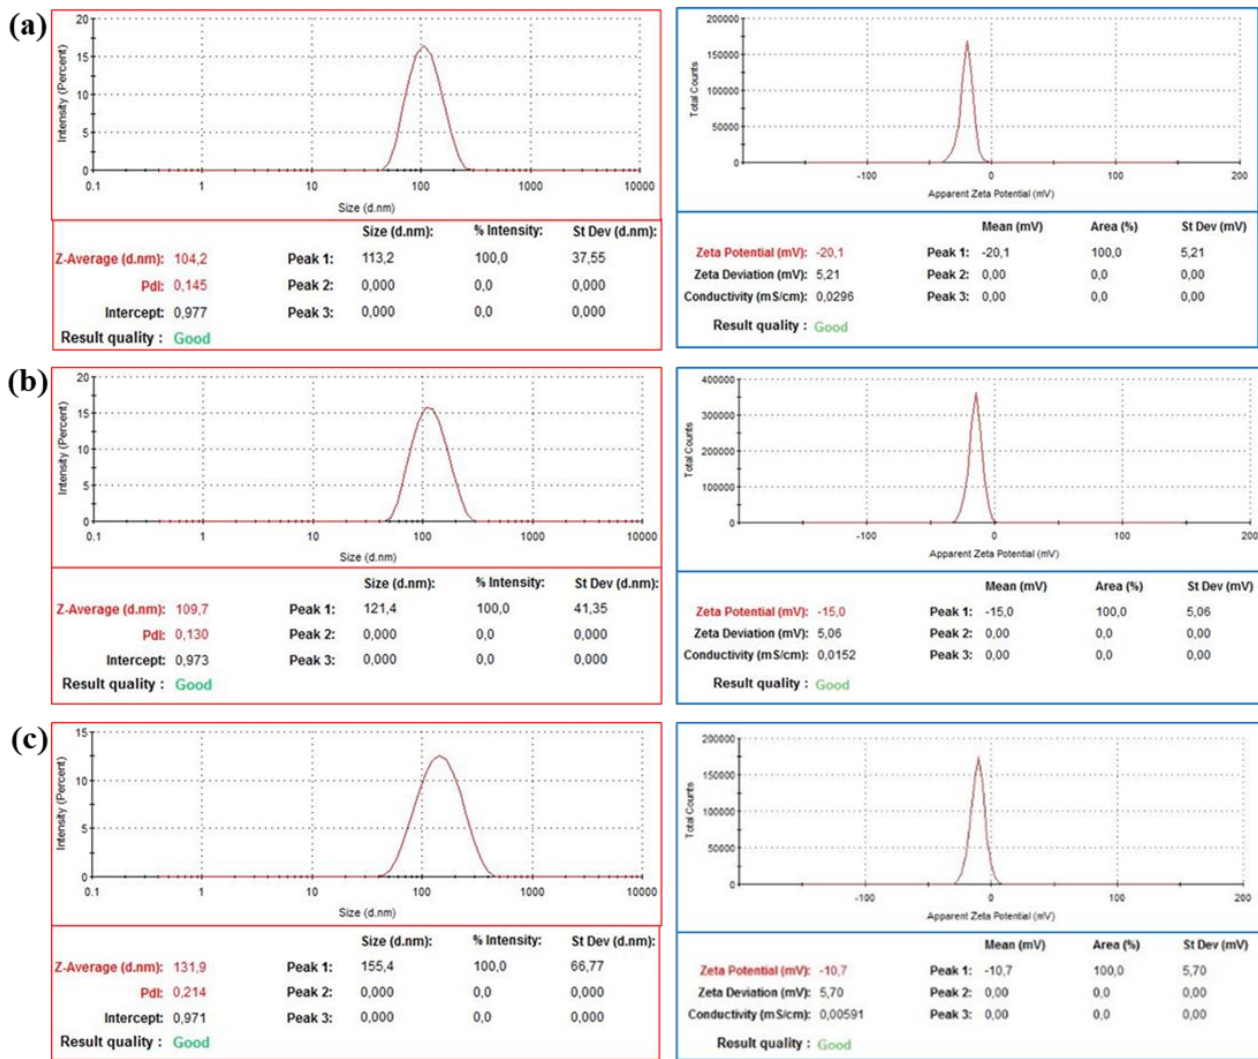

**Figure S8.** Distribution curves of mean size (intensity %) and zeta potential of sample Man-LPHFNPs@Roflumilast freeze-drying (a), and after freeze-drying and redispersion in bidistilled water (b) or in a 10 mM NaCl aqueous solution (c).
